# Supplementary material for: Ultra-Processed Food Consumption and Chronic Non-Communicable Diseases-Related Dietary Nutrient Profile in the UK (2008–2014)
Source: Nutrients. 2018 May 9;10(5):587. doi: 10.3390/nu10050587 (PMC5986467; doi:10.3390/nu10050587)
Supplement: Supplementary file 1 [file nutrients-10-00587-s001.pdf]

**Supplementary Table S1. Coding of subsidiary food groups from National Diet and Nutrition Survey according to NOVA classification.**

| Subsidiary food group code | Subsidiary food group name                                | NOVA food group† |
|----------------------------|-----------------------------------------------------------|------------------|
| 1C                         | Pizza                                                     | 4                |
| 1D                         | Pasta (manufactured products and ready meals)             | 4                |
| 1E                         | Pasta (other, including homemade dishes)                  | *                |
| 1F                         | Rice (manufactured products and ready meals)              | 4                |
| 1G                         | Rice (other, including homemade dishes)                   | *                |
| 1R                         | Other cereals                                             | *                |
| 2R                         | White bread (not high fibre, not multiseed bread)         | 4                |
| 3R                         | Wholemeal bread                                           | 4                |
| 4R                         | Other bread                                               | 4                |
| 5R                         | High fibre breakfast cereals                              | 4                |
| 6R                         | Other breakfast cereals (not high fibre)                  | 4                |
| 7A                         | Biscuits(manufactured/retail)                             | 4                |
| 7B                         | Biscuits (homemade)                                       | *                |
| 8B                         | Fruit pies (manufactured)                                 | 4                |
| 8C                         | Fruit pies (homemade)                                     | *                |
| 8D                         | Buns cakes and pastries (manufactured)                    | 4                |
| 8E                         | Buns cakes and pastries (homemade)                        | *                |
| 9C                         | Cereal based milk puddings (manufactured)                 | 4                |
| 9D                         | Cereal based milk puddings (homemade)                     | *                |
| 9E                         | Sponge puddings (manufactured)                            | 4                |
| 9F                         | Sponge puddings (homemade)                                | *                |
| 9G                         | Other cereal based puddings (manufactured)                | 4                |
| 9H                         | Other cereal based puddings (homemade)                    | *                |
| 10R                        | Whole milk                                                | 1                |
| 11R                        | Semi-skimmed milk                                         | 1                |
| 12R                        | Skimmed milk                                              | 1                |
| 13A                        | Infant formula                                            | 4                |
| 13B                        | Cream (including imitation cream)                         | *                |
| 13R                        | Other milk                                                | *                |
| 14A                        | Cottage cheese                                            | 3                |
| 14B                        | Cheddar cheese                                            | 3                |
| 14R                        | Other cheese                                              | *                |
| 15B                        | Yogurt                                                    | *                |
| 15C                        | Fromage frais and other dairy desserts (manufactured)     | 4                |
| 15D                        | Dairy desserts (homemade)                                 | *                |
| 16C                        | Manufactured egg products, including ready meals          | 4                |
| 16D                        | Other eggs and egg dishes, including homemade             | *                |
| 17R                        | Butter                                                    | 2                |
| 18A                        | Polyunsaturated margarine                                 | 4                |
| 18B                        | Polyunsaturated oils                                      | 2                |
| 19A                        | Polyunsaturated low fat spread                            | 4                |
| 19R                        | Low fat spread not polyunsaturated                        | 4                |
| 20A                        | Block margarine                                           | 4                |
| 20B                        | Soft margarine not polyunsaturated                        | 4                |
| 20C                        | Other cooking fats and oils not polyunsaturated           | 2                |
| 21A                        | Reduced fat spread (polyunsaturated)                      | 4                |
| 21B                        | Reduced fat spread (not polyunsaturated)                  | 4                |
| 22A                        | Ready meals/meal centres based on bacon and ham           | 4                |
| 22B                        | Other bacon and ham (including homemade dishes)           | *                |
| 23A                        | Manufactured beef products (including ready meals)        | 4                |
| 23B                        | Other beef & veal (including homemade recipe dishes)      | *                |
| 24A                        | Manufactured lamb products (including ready meals)        | 4                |
| 24B                        | Other lamb (including homemade recipe dishes)             | *                |
| 25A                        | Manufactured pork products(including ready meals)         | 4                |
| 25B                        | Other pork (including homemade recipe dishes)             | *                |
| 26A                        | Manufactured coated chicken/turkey products               | 4                |
| 27A                        | Manufactured chicken products (including ready meals)     | 4                |
| 27B                        | Other chicken/turkey (including homemade recipe dishes)   | *                |
| 28R                        | Liver and dishes                                          | *                |
| 29R                        | Burgers and kebabs purchased                              | 4                |
| 30A                        | Ready meals based on sausages                             | 4                |
| 30B                        | Other sausages (including homemade dishes)                | *                |
| 31A                        | Meat pies and pastries (manufactured)                     | 4                |
| 31B                        | Meat pies and pastries (homemade)                         | *                |
| 32A                        | Other meat products (manufactured including ready meals)  | 4                |
| 32B                        | Other meat (including homemade recipe dishes)             | *                |
| 33R                        | White fish coated or fried                                | *                |
| 34C                        | Manufactured white fish products (including ready meals)  | 4                |
| 34D                        | Other white fish (including homemade dishes)              | *                |
| 34E                        | Manufactured shellfish products (including ready meals)   | 4                |
| 34F                        | Other shellfish (including homemade dishes)               | *                |
| 34G                        | Manufactured canned tuna products (including ready meals) | *                |

|     |                                                                     |    |
|-----|---------------------------------------------------------------------|----|
| 34H | Other canned tuna (including homemade dishes)                       | *  |
| 35A | Manufactured oily fish products (including ready meals)             | 4  |
| 35B | Other oily fish (including homemade dishes)                         | *  |
| 36A | Carrots (raw)                                                       | 1  |
| 36B | Salad and other raw vegetables                                      | *  |
| 36C | Tomatoes raw                                                        | 1  |
| 37A | Peas not raw                                                        | *  |
| 37B | Green beans not raw                                                 | *  |
| 37C | Baked beans                                                         | 4  |
| 37D | Leafy green vegetables not raw                                      | *  |
| 37E | Carrots not raw                                                     | *  |
| 37F | Tomatoes not raw                                                    | *  |
| 37I | Beans and pulses (including ready meal & homemade dishes)           | *  |
| 37K | Meat alternatives (including ready meals and homemade dishes)       | 4  |
| 37L | Other manufactured vegetable products (including ready meals)       | 4  |
| 37M | Other vegetables (including homemade dishes)                        | *  |
| 38A | Chips purchased including takeaway                                  | 4  |
| 38C | Other manufactured potato products fried/baked                      | 4  |
| 38D | Other fried/roast potatoes (including homemade dishes)              | *  |
| 39A | Other potato products and dishes(manufactured)                      | 4  |
| 39B | Other potatoes (including homemade dishes)                          | *  |
| 40A | Apples and pears not canned                                         | *  |
| 40B | Citrus fruit not canned                                             | *  |
| 40C | Bananas                                                             | *  |
| 40D | Canned fruit in juice                                               | *  |
| 40E | Canned fruit in syrup                                               | 3  |
| 40R | Other fruit not canned                                              | *  |
| 41A | Sugar                                                               | *  |
| 41B | Preserves                                                           | 3  |
| 41R | Sweet spreads fillings and icing                                    | 4  |
| 42R | Crisps and savoury snacks                                           | 4  |
| 43R | Sugar confectionery                                                 | 4  |
| 44R | Chocolate confectionery                                             | 4  |
| 45R | Fruit juice                                                         | *  |
| 47A | Liqueurs                                                            | 4  |
| 47B | Spirits                                                             | 4  |
| 48A | Wine                                                                | 3  |
| 48B | Fortified wine                                                      | 4  |
| 48C | Low alcohol and alcohol free wine                                   | 3  |
| 49A | Beers and lagers                                                    | 3  |
| 49B | Low alcohol & alcohol free beer & lager                             | 3  |
| 49C | Cider and Perry                                                     | 4  |
| 49D | Low alcohol & alcohol free cider & Perry                            | 4  |
| 49E | Alcoholic soft drinks (Alcopops)                                    | 4  |
| 50A | Beverages dry weight                                                | 4  |
| 50C | Soup (manufactured/retail)                                          | 4  |
| 50D | Soup (homemade)                                                     | *  |
| 50E | Nutrition powders and drinks                                        | 4  |
| 50R | Savoury sauces pickles gravies & condiments                         | 4  |
| 51A | Coffee (made up weight)                                             | *  |
| 51B | Tea (made up)                                                       | *  |
| 51C | Herbal tea (made up)                                                | 1  |
| 51D | Bottled water still or carbonated                                   | *  |
| 51R | Tap water only                                                      | 1  |
| 52A | Commercial toddlers drinks                                          | 3  |
| 52R | Commercial toddlers foods                                           | 3  |
| 53R | Ice cream                                                           | 4  |
| 54A | Cod liver oil and other fish oils                                   | ** |
| 54B | Evening primrose oil and other plant oils                           | ** |
| 54C | Single vitamins/minerals not Folic acid, iron, calcium              | ** |
| 54D | Folic acid                                                          | ** |
| 54E | Iron only or with vitamin C                                         | ** |
| 54F | Calcium only or with vitamin D                                      | ** |
| 54G | Vitamins (two or more including multivitamins) no minerals          | ** |
| 54H | Minerals (two or more including multimineral) no vitamins           | ** |
| 54I | Vitamins and minerals (including multivitamins & minerals)          | ** |
| 54J | Non-nutrient supplements (including herbal)                         | ** |
| 54K | Other nutrient supplements                                          | ** |
| 54L | Vitamin C                                                           | ** |
| 54M | Single vitamins/minerals not Folic acid, iron, calcium or vitamin C | ** |
| 54N | Cod liver oil and other fish oils (including with vitamins A, D, E) | ** |
| 54P | Multivitamins and/or minerals with omega ultra-processed            | ** |
| 55R | Artificial sweeteners                                               | 4  |
| 56R | Nuts and seeds                                                      | *  |
| 57A | Soft drinks not low calorie concentrated                            | 4  |
| 57B | Soft drinks not low calorie carbonated                              | 4  |

|     |                                                    |   |
|-----|----------------------------------------------------|---|
| 57C | Soft drinks not low calorie, ready to drink, still | 4 |
| 58A | Soft drinks low calorie concentrated               | 4 |
| 58B | Soft drinks low calorie carbonated                 | 4 |
| 58C | Soft drinks low calorie, ready to drink, still     | 4 |
| 59R | Brown, granary and wheat germ bread                | 4 |
| 60R | 1% Milk                                            | 1 |
| 61R | Smoothies                                          | 1 |

† NOVA food groups defined as 1) unprocessed or minimally processed foods; 2) processed culinary ingredients; 3) processed foods; and 4) ultra-processed foods.

\* All foods within this subsidiary food group were individually coded (by food name).

\*\* Supplements were not included in any of the NOVA food groups.
